# Supplementary material for: Nanometer-scale ordering in cast films of columnar metallomesogen as revealed by STM observations
Source: Royal Society of Chemistry journal article supplement (doi:10.1039/b419429b), 2005-01-01
Supplement: b419429b.pdf [file b419429b.pdf]

## Supporting information

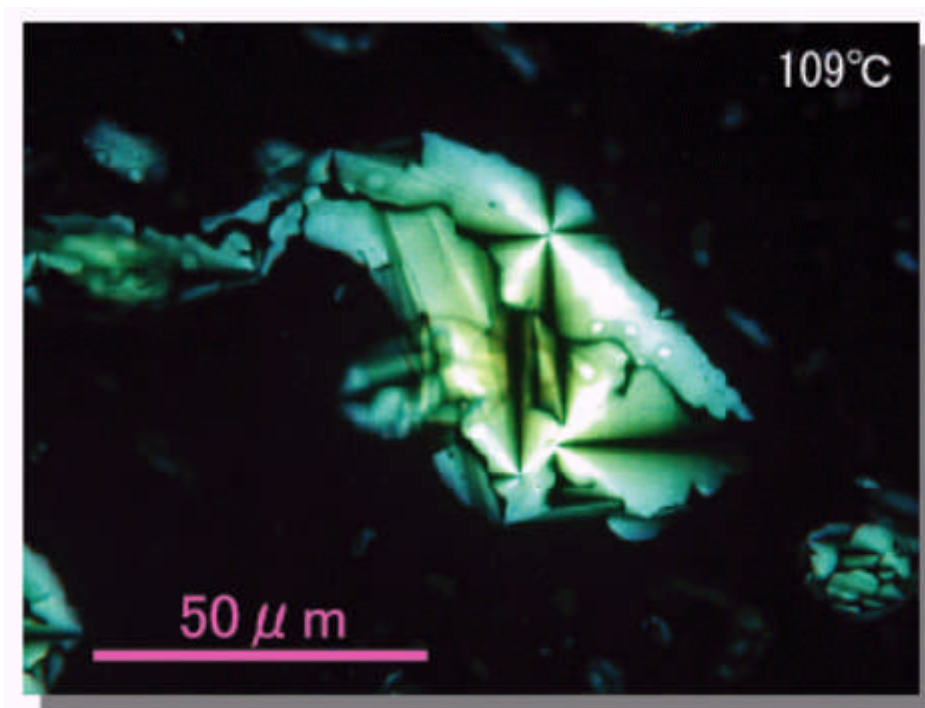

Focal conic fan texture of [Cr(5C<sub>8</sub>)<sub>3</sub>] was observed under a polarized light microscope at 109 °C

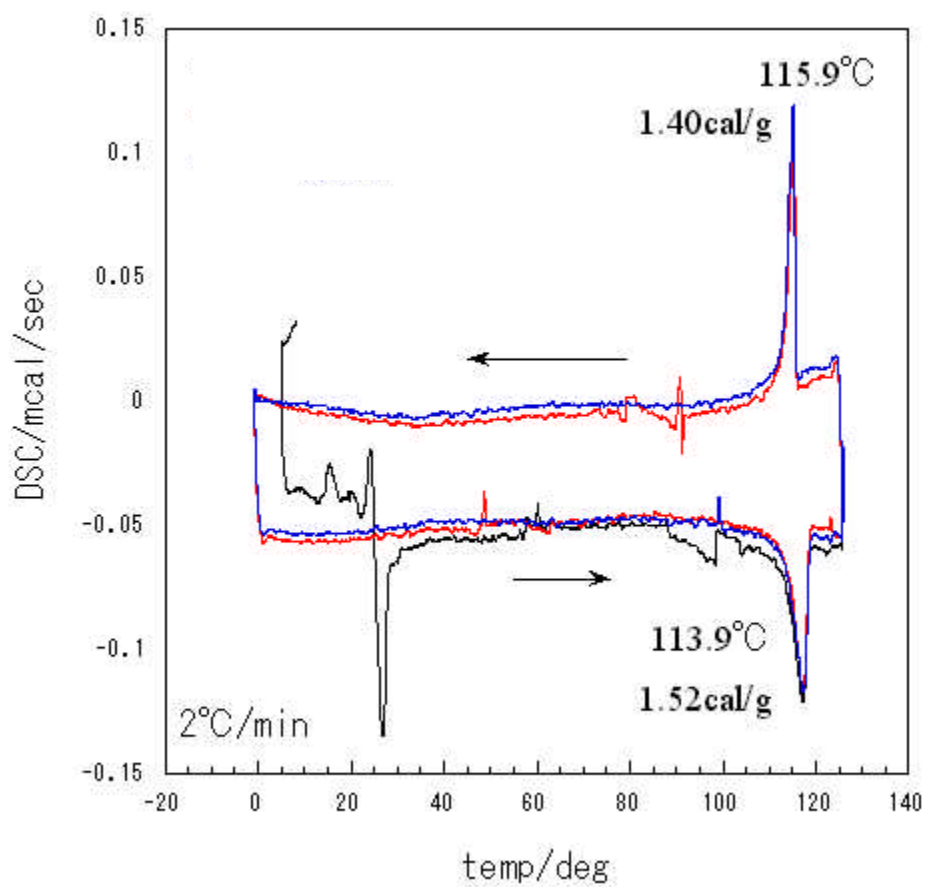

DSC thermogram displayed sharp transitions both on heating and cooling for Col<sub>I</sub>-I at 115 °C
